# Supplementary material for: Ling Zhi-8, a fungal immunomodulatory protein in Ganoderma lucidum, alleviates CPT-11-induced intestinal injury via restoring claudin-1 expression
Source: publisher site journal article supplement (doi:10.18632/aging.204695), 2023-05-05
Supplement: Supplementary file [file aging-v15i9-204695-supplementary-material-SD1.pdf]

## SUPPLEMENTARY FIGURE

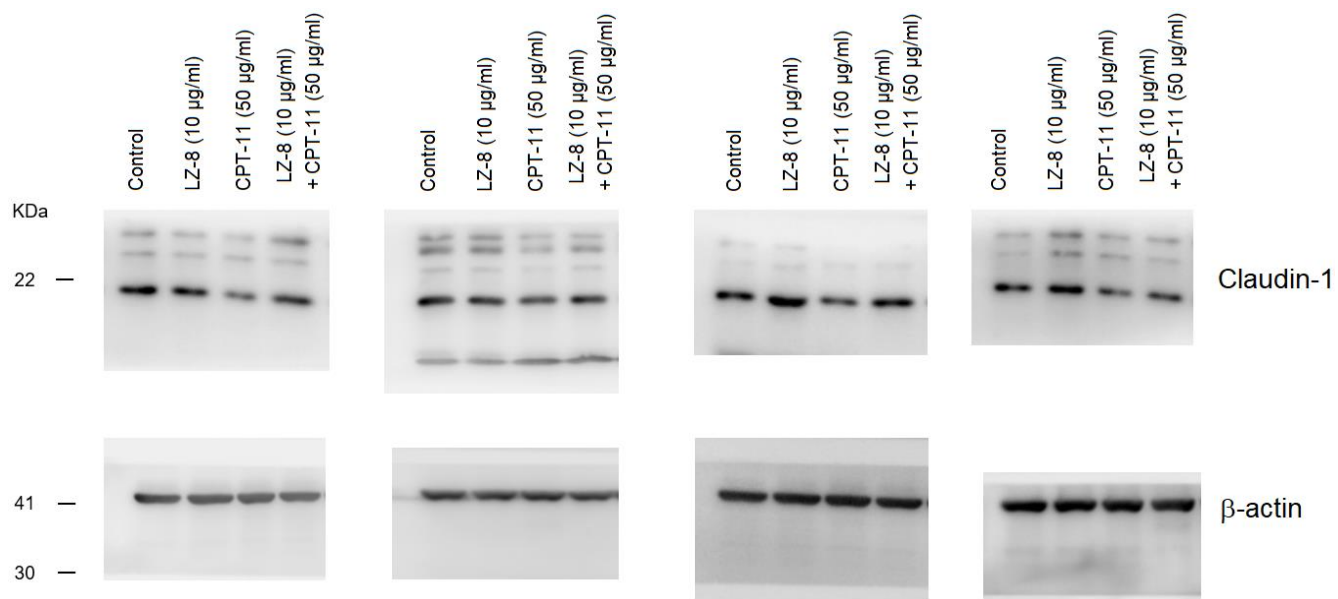

Supplementary Figure 1. Full, uncropped Western blots.
